# Supplementary material
Source: PubMed Central journal article supplement (PMC4713356)
Supplement: NIHMS738300-supplement-supplement_1.pdf [file NIHMS738300-supplement-supplement_1.pdf]

1  
2  
3  
4  
5  
6  
7  
8  
9  
10  
11

**Fig. S1** Densitometric analysis of dot blots containing immobilized salivary secretions, naturally occurring glycoproteins and related neoglycoproteins overlaid with capsule-free *S. pneumoniae* TIGR4 mutant HR1001.1 (grey bars) and its isogenic PsrP-deficient mutant ( $\Delta psrP$ ) (white bars). The representative dots shown on the left are identical to the ones shown in Fig. 4 (see tables S1 and S2). Fluorescent signals of bound bacteria were analyzed by densitometry using the ImageQuant 5.2 software. The bars on the right represent the mean densitometric volumes obtained from two independent experiments.

12 **Table S1.** Naturally occurring glycoproteins used in this study.

| <b>Position</b> | <b>Glycoproteins</b>                 | <b>Origin</b>                                                                                      |
|-----------------|--------------------------------------|----------------------------------------------------------------------------------------------------|
| B1, B2          | Salivary mucin-5B (MUC5B)            | Prepared as previously described (Ramasubbu <i>et al.</i> , 1991); Gift from Dr. Molakala S. Reddy |
| B3, B4          | Salivary mucin-7 (MUC7)              | Prepared as previously described (Ramasubbu <i>et al.</i> , 1991); Gift from Dr. Molakala S. Reddy |
| B5              | Bovine serum albumin (BSA)           | From cow; Pierce, Thermo Scientific                                                                |
| <del>C5</del>   | <del>Human serum albumin (HSA)</del> | <del>From human; Fraction V, Sigma-Aldrich</del>                                                   |
| C1, C2          | Glycophorin A                        | From blood type MN; Sigma-Aldrich                                                                  |
| C3, C4          | Fetuin                               | From fetal calf serum; Sigma-Aldrich                                                               |
| C5              | Human serum albumin (HSA)            | From human; Fraction V, Sigma-Aldrich                                                              |

13

14

15

16 **Table S2.** Neoglycoproteins used in this study

| Position | BSA/HSA-glycoproteins                      | Oligosaccharide conjugates                                                       |
|----------|--------------------------------------------|----------------------------------------------------------------------------------|
| B6       | Spacer for PAA conjugates                  | HOCH <sub>2</sub> (HOCH) <sub>4</sub> CH <sub>2</sub> NH-PAA <sup>a</sup>        |
| C6       | Spacer for PAA-Biotin conjugates           | HOCH <sub>2</sub> (HOCH) <sub>4</sub> CH <sub>2</sub> NH-PAA-Biotin <sup>a</sup> |
| D1       | Sialyl-T-antigen-PAA                       | Neu5Acα2-3Galβ1-3GalNAcα-PAA <sup>a</sup>                                        |
| D2       | T-antigen-PAA                              | Galβ1-3GalNAcα-PAA <sup>a</sup>                                                  |
| D3       | T-antigen-HSA                              | Galβ1-3GalNAcα1-O-APE-HSA <sup>b</sup>                                           |
| D4       | No specified name                          | (Galα1-3GalNAcα-O-spacer) <sub>n</sub> -HSA <sup>c</sup>                         |
| D5       | No specified name                          | (GalNAcβ1-3Galα-O-spacer) <sub>n</sub> -BSA <sup>c</sup>                         |
| D6       | No specified name                          | (GalNAcβ1-4Galβ-O-spacer) <sub>n</sub> -BSA <sup>c</sup>                         |
| E1       | Sialyl-Lewis a-HSA                         | Neu5Acα2-3Galβ1-3[Fucaα1-4]GlcNAcβ1-3Galβ1-4(Glc)-APD-HSA <sup>b</sup>           |
| E2       | Lewis a-HSA                                | Galβ1-3[Fucaα1-4]GlcNAcβ1-3Galβ1-4(Glc)-APD-HSA <sup>b</sup>                     |
| E3       | H type 1-HSA                               | Fucaα1-2Galβ1-3GlcNAcβ1-3Galβ1-4(Glc)-APD-HSA <sup>b</sup>                       |
| E4       | Lacto- <i>N</i> -tetraose-HSA              | Galβ1-3GlcNAcβ1-3Galβ1-4(Glc)-APD-HSA <sup>b</sup>                               |
| E5       | 3'-sialyl- <i>N</i> -acetyllactosamine-BSA | Neu5Acα2-3Galβ1-4GlcNAc-3 atom spacer-BSA <sup>d</sup>                           |
| E6       | <i>N</i> -acetyllactosamine-BSA            | Galβ1-4GlcNAc-3 atom spacer-BSA <sup>d</sup>                                     |
| F1       | Sialyl-Lewis x-HSA                         | Neu5Acα2-3Galβ1-4[Fucaα1-3]GlcNAcβ1-3Galβ1-4(Glc)-APD-HSA <sup>b</sup>           |
| F2       | Lewis x-HSA                                | Galβ1-4[Fucaα1-3]GlcNAcβ1-3Galβ1-4(Glc)-APD-HSA <sup>b</sup>                     |
| F3       | H type 2-HSA                               | Fucaα1-2Galβ1-4GlcNAcβ1-O-APE-HSA <sup>b</sup>                                   |
| F4       | Lacto- <i>N</i> -neotetraose-HSA           | Galβ1-4GlcNAcβ1-3Galβ1-4(Glc)-APD-HSA <sup>b</sup>                               |
| F5       | Lactose-BSA                                | (Galβ1-4Glcβ-O-spacer) <sub>n</sub> -BSA <sup>c</sup>                            |
| F6       | No specified name                          | GlcNAcβ1-3Galβ1-4Glcβ-PAA-Biotin <sup>a</sup>                                    |
| G1       | Globo- <i>N</i> -tetraose-HSA              | GalNAcβ1-3Galα1-4Galβ1-4(Glc)-APD-HSA <sup>b</sup>                               |
| G2       | Gangliotetraose-HSA                        | Galβ1-3GalNAcβ1-4Galβ1-4(Glc)-APD-HSA <sup>b</sup>                               |
| G3       | α-galactose-HSA                            | Galα1-O-PAP-HSA <sup>b</sup>                                                     |
| G4       | β-galactose-HSA                            | Galβ1-O-PAP-HSA <sup>b</sup>                                                     |
| G5       | α- <i>N</i> -acetylgalactosamine-HSA       | GalNAcα1-O-PAP-HSA <sup>b</sup>                                                  |
| G6       | β- <i>N</i> -acetylgalactosamine-HSA       | GalNAcβ1-O-PAP-HSA <sup>b</sup>                                                  |
| H1       | α-glucose-HSA                              | Glcα1-O-PAP-HSA <sup>b</sup>                                                     |
| H2       | α- <i>N</i> -acetylglucosamine-HSA         | GlcNAcα1-O-PAP-HSA <sup>b</sup>                                                  |
| H3       | β- <i>N</i> -acetylglucosamine-HSA         | GlcNAcβ1-O-PAP-HSA <sup>b</sup>                                                  |
| H4       | α-mannose-HSA                              | Manα1-O-PAP-HSA <sup>b</sup>                                                     |
| H5       | β-mannose-HSA                              | Manβ1-O-PAP-HSA <sup>b</sup>                                                     |

17 <sup>a</sup>GlycoTech, Gaithersburg, MD, United States

18 <sup>b</sup>IsoSep AB, Tullinge, Sweden

19 <sup>c</sup>Glycorex AB, Lund, Sweden

20 <sup>d</sup>Dextra-Laboratories, Reading, United Kingdom

21

## FIGURES

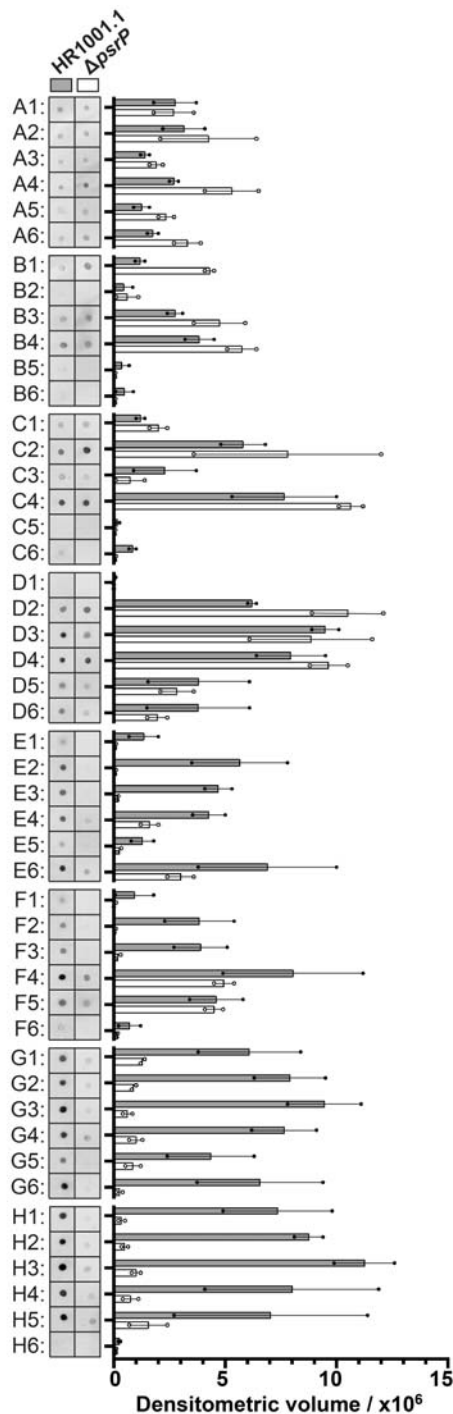

## SUPPORTING INFORMATION

### [Supplementary Figure 1.](#)

**Fig. S1** Densitometric analysis of dot blots containing immobilized salivary secretions, naturally occurring glycoproteins and related neoglycoproteins overlaid with capsule-free *S. pneumoniae* TIGR4 mutant HR1001.1 (grey bars) and its isogenic PsrP-deficient mutant ( $\Delta psrP$ ) (white bars). The representative dots shown on the left are identical to the ones shown in Fig. 4 (see tables S1 and S2). Fluorescent signals of bound bacteria were analyzed by densitometry using the ImageQuant 5.2 software. The bars on the right represent the mean densitometric volumes obtained from two independent experiments.
